# Supplementary material
Source: Frontiers journal article supplement (https://www.frontiersin.org/articles/151180)
Supplement: Image_2.PDF [file Image_2.PDF]

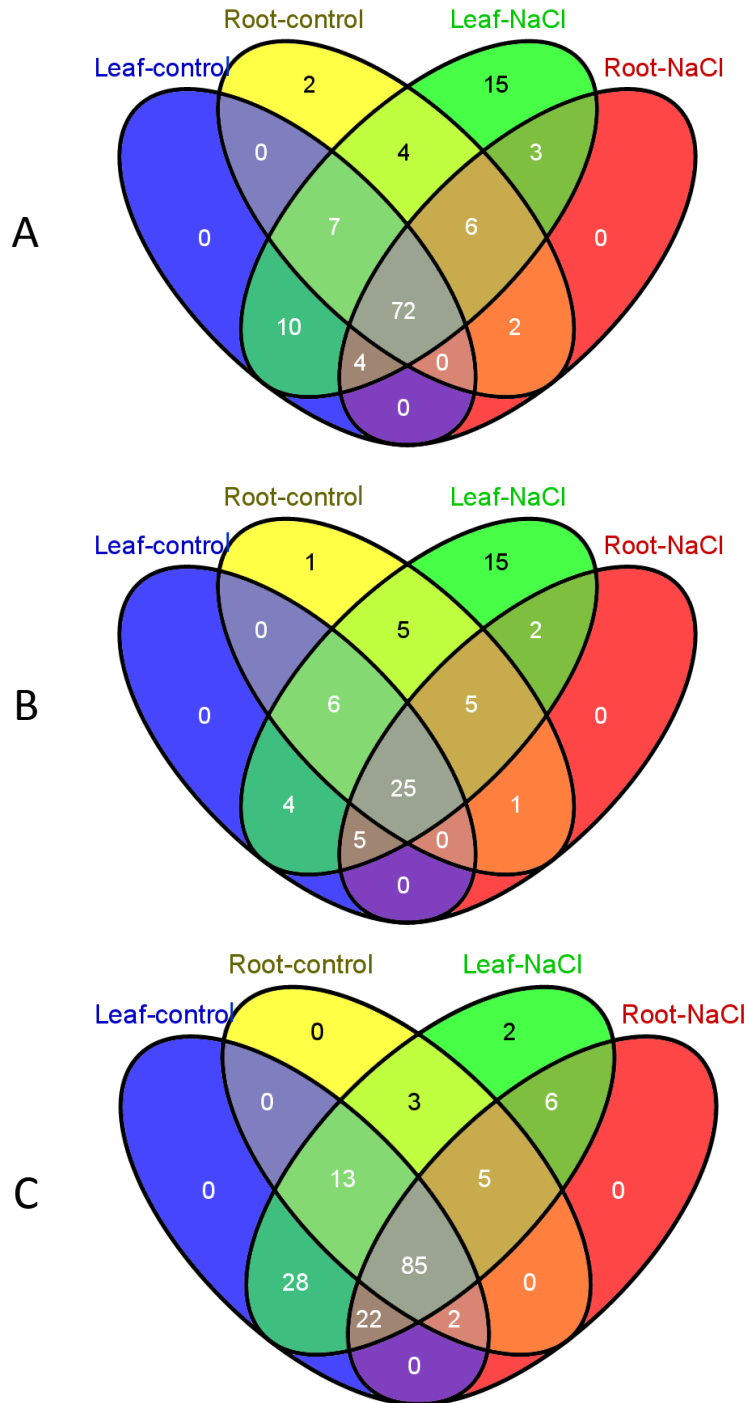

**Figure S2:** Venn Diagrams illustrate the number of conserved (A), variants (B) and potentially novel (C) miRNA identified in untreated and NaCl-leaves as well as untreated and NaCl-treated roots sRNA libraries. The numbers that are located in the overlapping area represent the number of shared miRNA in different libraries.
