# Supplementary material
Source: Frontiers journal article supplement (https://www.frontiersin.org/articles/151180)

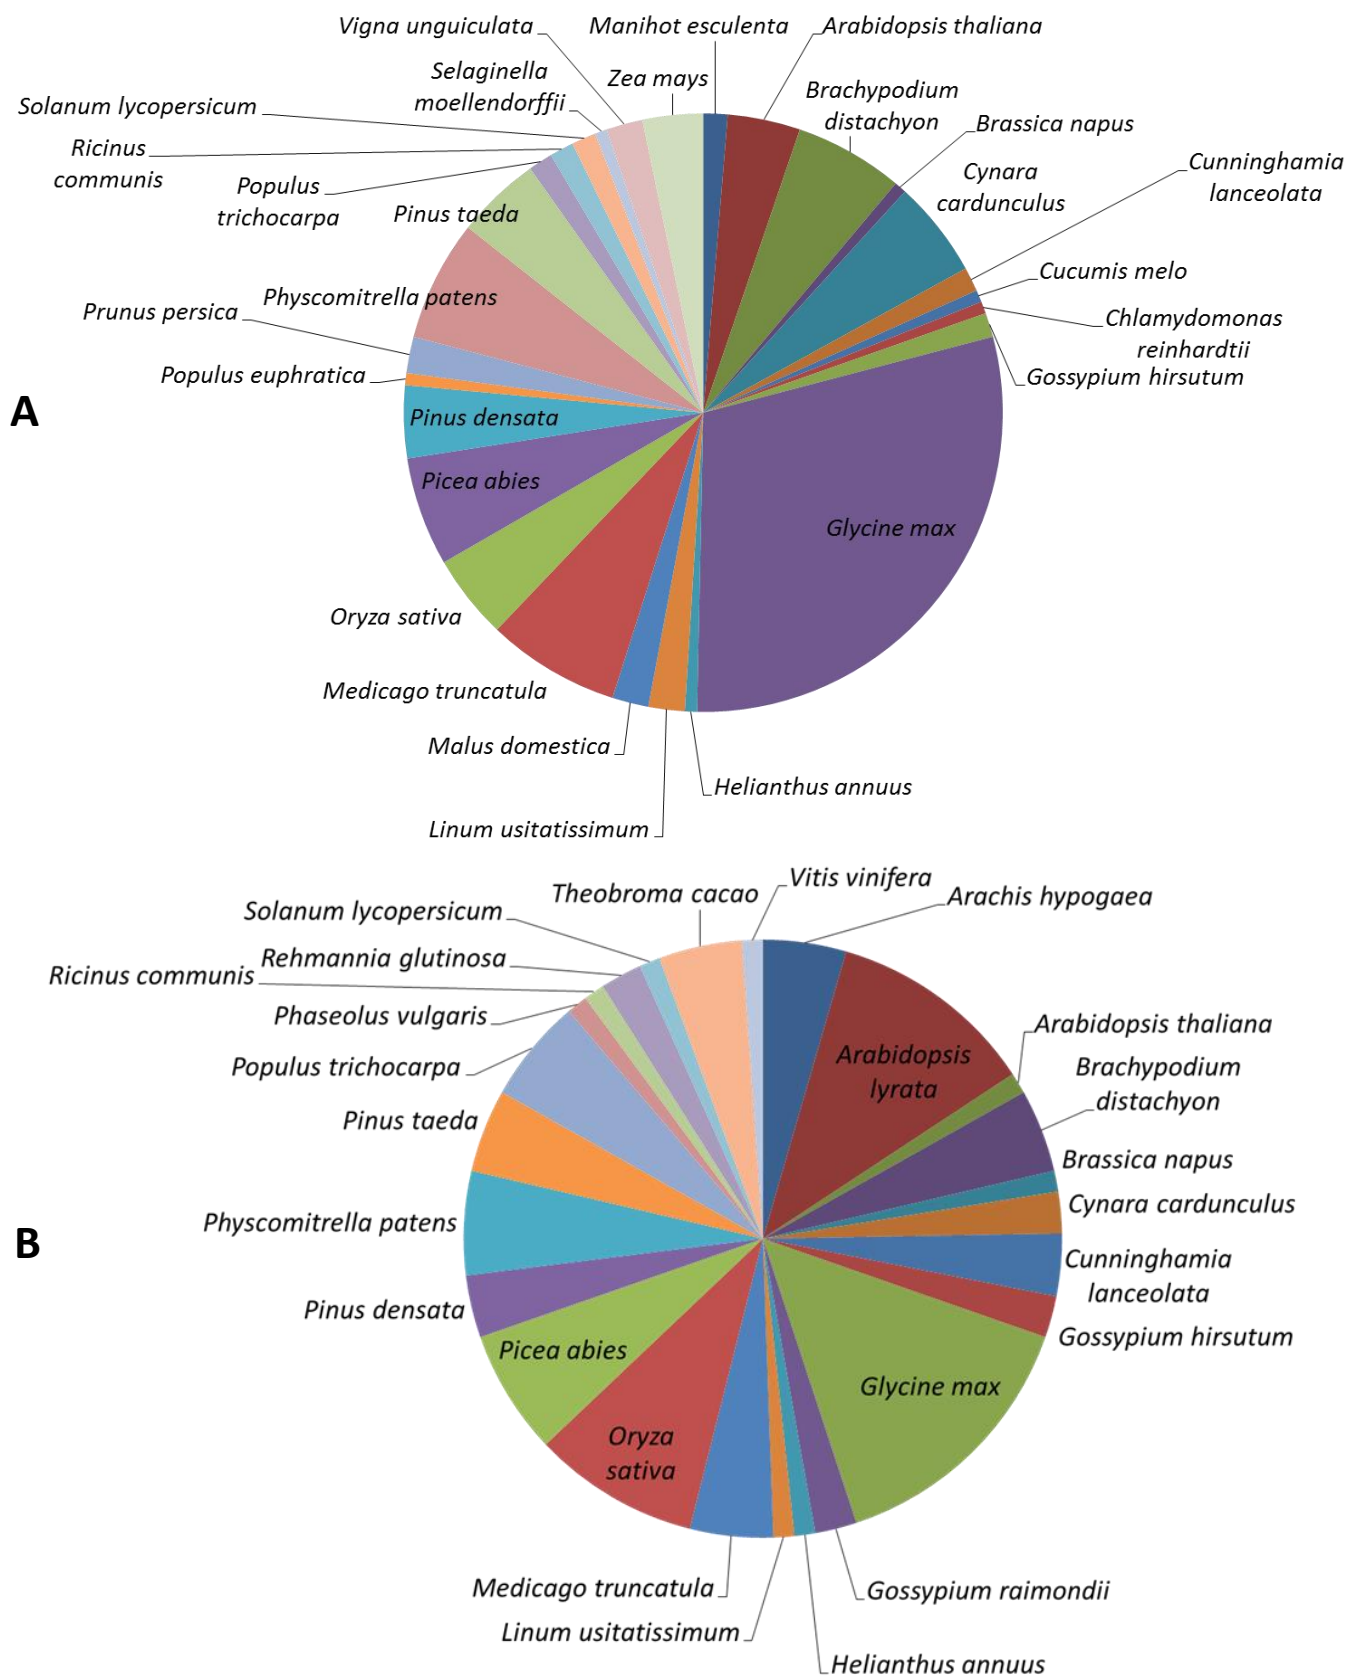

Supplement: Image_3.PDF [file Image_3.PDF]
