# Supplementary material
Source: Frontiers journal article supplement (https://www.frontiersin.org/articles/151180)
Supplement: Image_6.PDF [file Image_6.PDF]

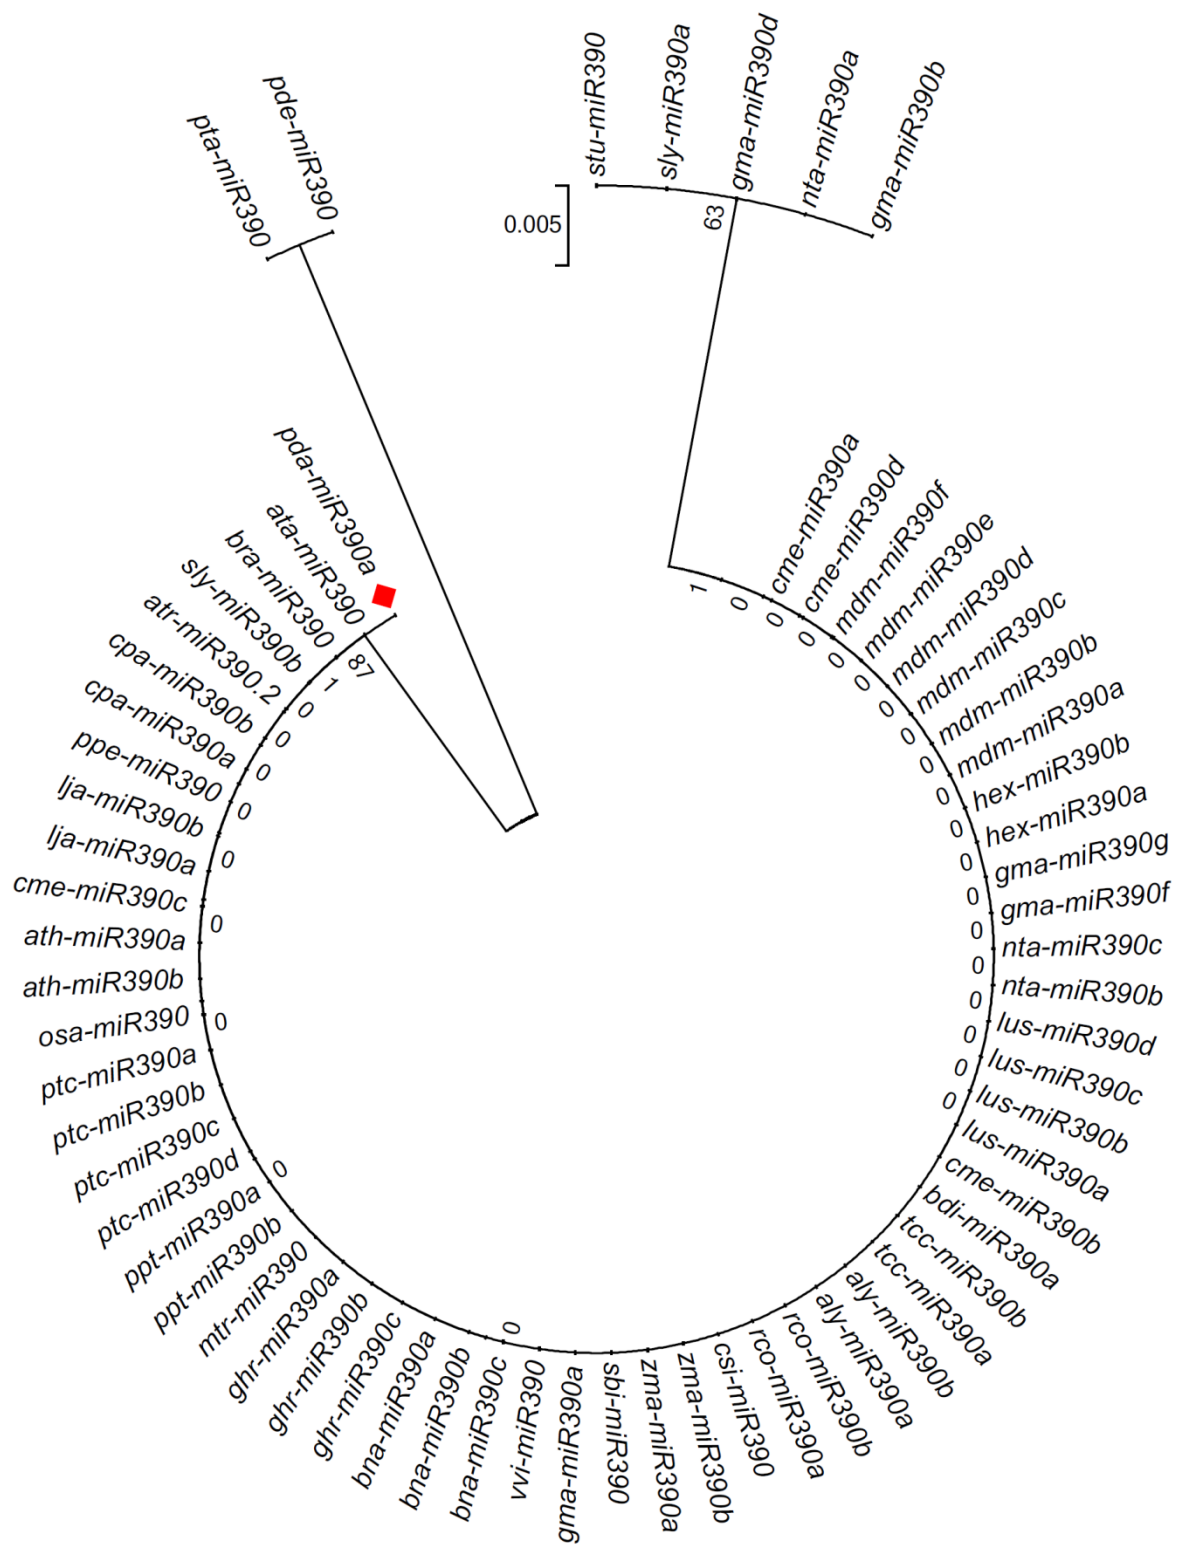

**Figure S6.** Phylogenetic analysis of the miRNA390 sequences. The phylogenetic tree showed the relationship between the miRNA sequenced from date palm (marked in red colour) and those previously sequenced from other plant species.
