# Supplementary material
Source: Frontiers journal article supplement (https://www.frontiersin.org/articles/151180)
Supplement: Image_7.PDF [file Image_7.PDF]

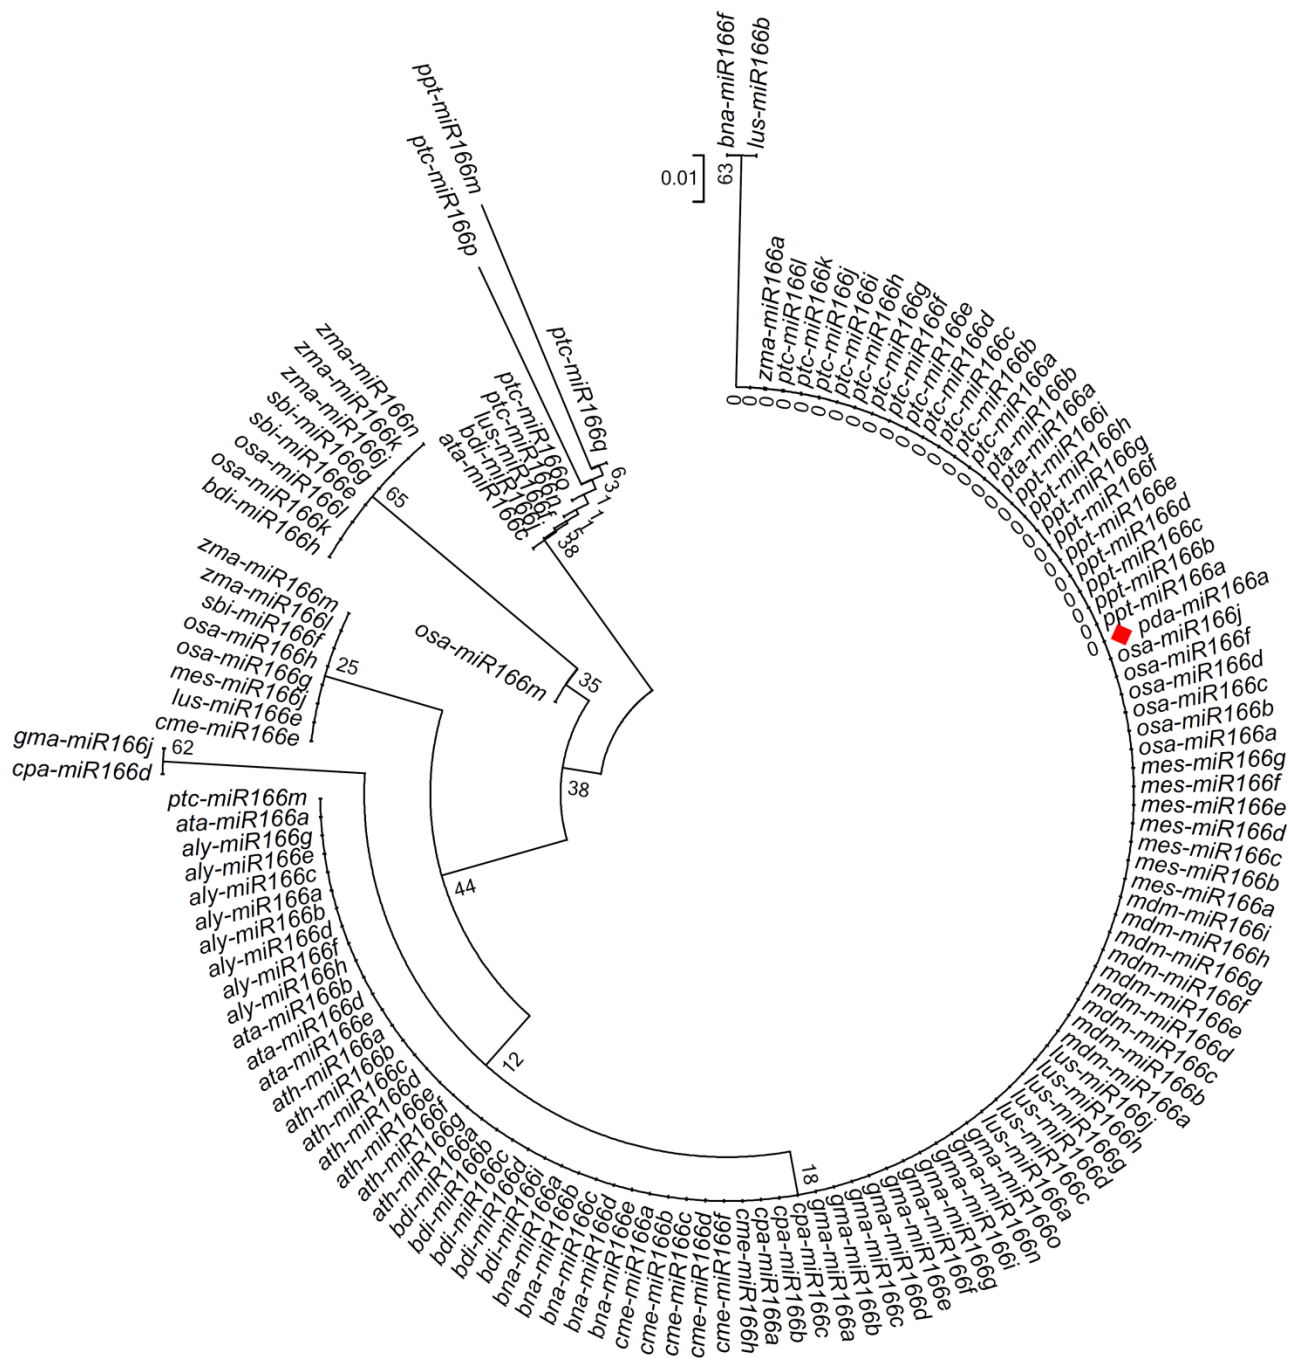

**Figure S7.** Phylogenetic analysis of the miRNA166 sequences. The phylogenetic tree showed the relationship between the miRNA sequenced from date palm (marked in red colour) and those previously sequenced from other plant species.
