# Supplementary material
Source: Frontiers journal article supplement (https://www.frontiersin.org/articles/151180)
Supplement: Image_9.PDF [file Image_9.PDF]

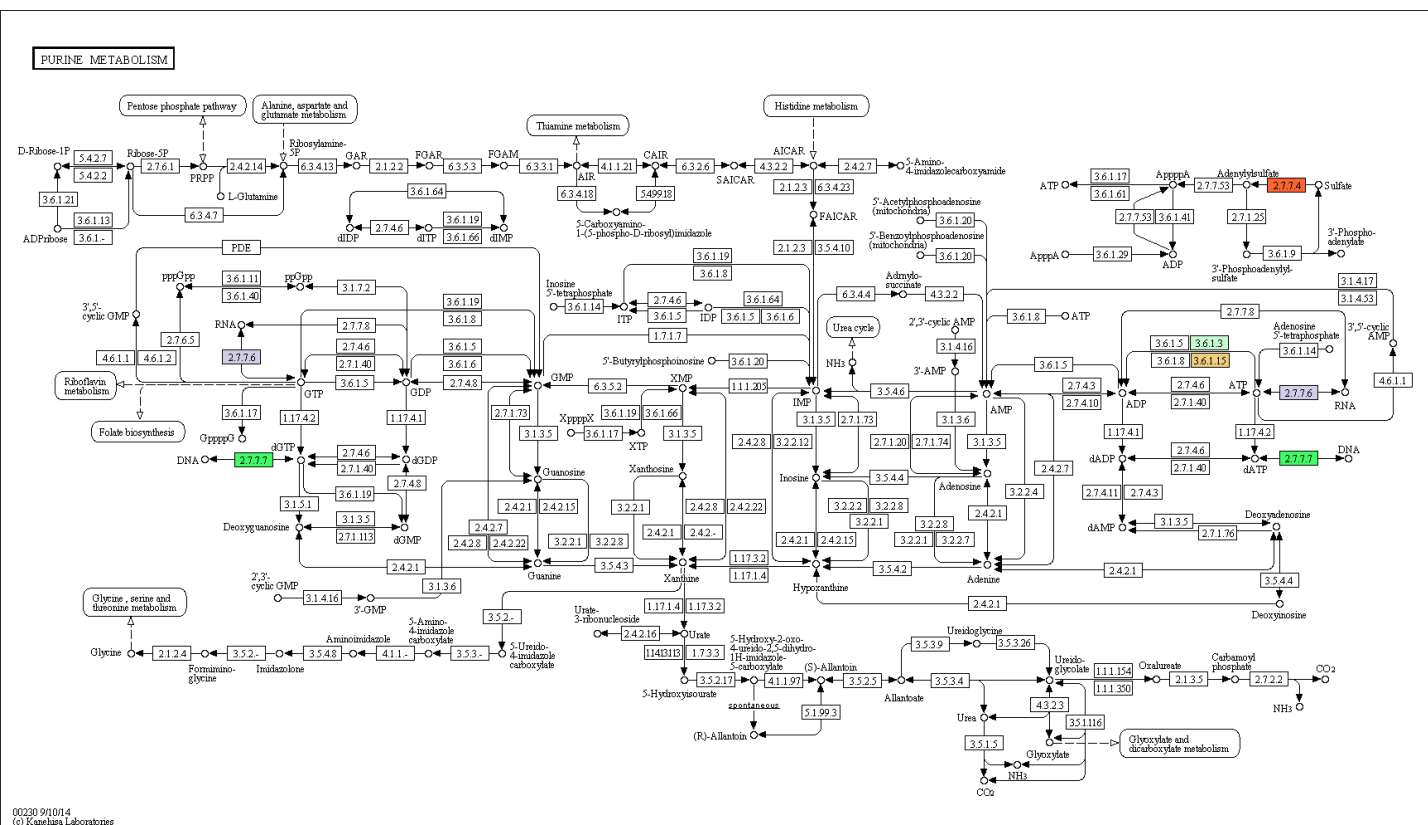

**Figure S9.** Purine metabolic pathway that shows the position of potential targets for miRNA isolated from *P. dactylifera* roots using the Kyoto Encyclopedia of Genes and Genomes (KEGG).
